# Supplementary material for: Transient Autoreactive PF4 and Antiphospholipid Antibodies in COVID-19 Vaccine Recipients
Source: MDPI journal article supplement (doi:10.3390/vaccines11121851), 2023-12-14
Supplement: s1 [file s1]

## Supplementary Materials

### Text S1. Direct acyclic graph and assumptions

The assumptions underlying the cross-sectional analysis in the main text are summarized in e-Figure 1. In this analysis, we estimated the correlations between PF4 antibody (aPF4) levels and various covariates, including sex, age at vaccination, prior COVID-19 infection status, type of vaccination and study center. We assumed that each correlation is confounded by a distinct set of predefined covariates. As a result, we performed multiple multivariable analyses, using different covariates for each correlation.

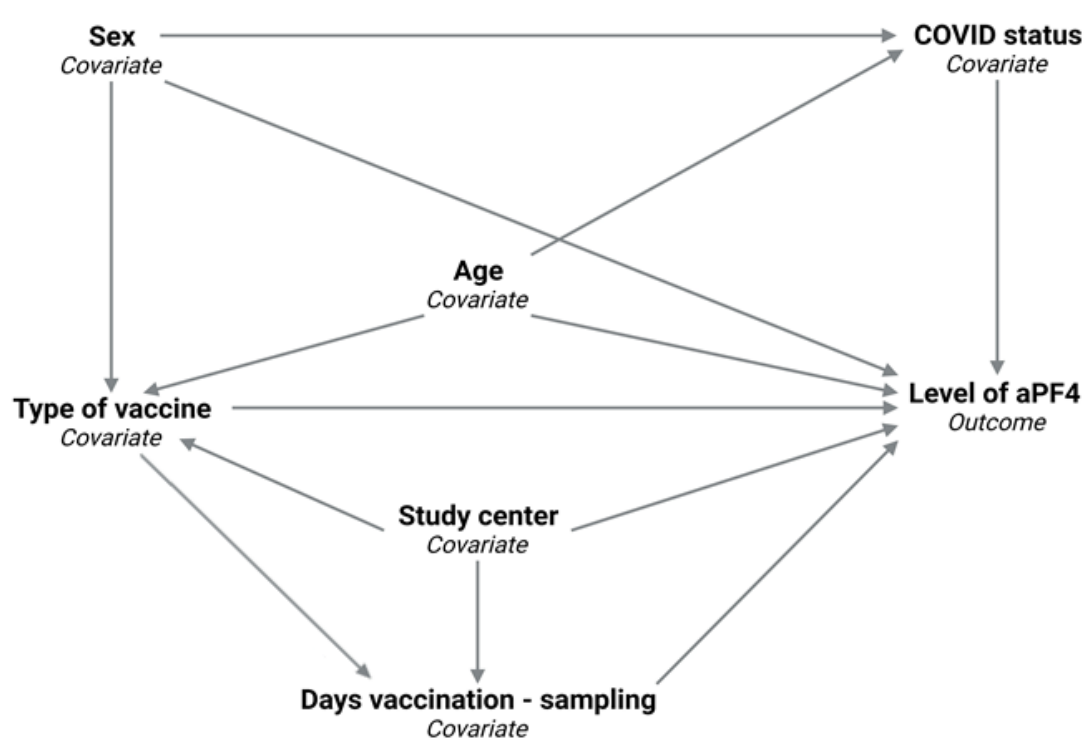

**Figure S1. The correlation between the different covariates and the level of PF4 antibodies.** The correlation between level of aPF4 and the different covariations and the confounders and mediators of these correlations illustrated in a directed acyclic graph. The arrows indicate the direction of the relationship.

**Table S1** Correlations between aPF4 and aPL antibodies in every vaccine recipient

|    |                          | At time point T1        |                             |                   |                   | At time point T2        |                             |                   |                   | At time point T3        |                             |                   |                   |
|----|--------------------------|-------------------------|-----------------------------|-------------------|-------------------|-------------------------|-----------------------------|-------------------|-------------------|-------------------------|-----------------------------|-------------------|-------------------|
|    |                          | aPF4 IgG<br>(O.D units) | aβ2GP<br>total Ig<br>(U/mL) | aCL IgM<br>(U/mL) | aCL IgG<br>(U/mL) | aPF4 IgG<br>(O.D units) | aβ2GP<br>total Ig<br>(U/mL) | aCL IgM<br>(U/mL) | aCL IgG<br>(U/mL) | aPF4 IgG<br>(O.D units) | aβ2GP<br>total Ig<br>(U/mL) | aCL IgM<br>(U/mL) | aCL IgG<br>(U/mL) |
| T1 | aPF4 IgG<br>(O.D units)  |                         | −0.03                       | −0.06             | 0.11              | 0.81**                  | −0.05                       | 0.00              | 0.14              | 0.81**                  | 0.05                        | 0.04              | 0.22              |
|    | aβ2GP total Ig<br>(U/mL) | −0.03                   |                             | 0.53**            | 0.54**            | −0.01                   | 0.86**                      | 0.47**            | 0.49**            | −0.04                   | 0.87**                      | 0.41**            | 0.42**            |
|    | aCL IgM<br>(U/mL)        | −0.06                   | 0.53**                      |                   | 0.39**            | −0.09                   | 0.55**                      | 0.88**            | 0.37**            | −0.14                   | 0.36**                      | 0.87**            | 0.30**            |
|    | aCL IgG<br>(U/mL)        | 0.11                    | 0.54**                      | 0.39**            |                   | 0.14                    | 0.44**                      | 0.35**            | 0.75**            | 0.06                    | 0.40**                      | 0.32**            | 0.65**            |
| T2 | aPF4 IgG<br>(O.D units)  | 0.81**                  | −0.01                       | −0.09             | 0.14              |                         | −0.05                       | −0.07             | 0.17              | 0.86**                  | −0.01                       | −0.09             | 0.25              |
|    | aβ2GP total Ig<br>(U/mL) | −0.05                   | 0.86**                      | 0.55**            | 0.44**            | −0.05                   |                             | 0.51**            | 0.54**            | −0.11                   | 0.86**                      | 0.47**            | 0.49**            |
|    | aCL IgM<br>(U/mL)        | 0.00                    | 0.47**                      | 0.88**            | 0.35**            | −0.07                   | 0.51**                      |                   | 0.40**            | −0.15                   | 0.35**                      | 0.86**            | 0.33**            |
|    | aCL IgG<br>(U/mL)        | 0.14                    | 0.49**                      | 0.37**            | 0.75**            | 0.17*                   | 0.54**                      | 0.40**            |                   | 0.17                    | 0.34**                      | 0.38**            | 0.78**            |
| T3 | aPF4 IgG<br>(O.D units)  | 0.81**                  | −0.04                       | −0.14             | 0.06              | 0.86**                  | −0.11                       | −0.15             | 0.17              |                         | −0.06                       | −0.07             | 0.20*             |
|    | aβ2GP total Ig<br>(U/mL) | 0.05                    | 0.87**                      | 0.36**            | 0.40**            | −0.01                   | 0.86**                      | 0.35**            | 0.34**            | −0.06                   |                             | 0.40**            | 0.47**            |
|    | aCL IgM<br>(U/mL)        | 0.04                    | 0.41**                      | 0.87**            | 0.32**            | −0.08                   | 0.47**                      | 0.86**            | 0.38**            | −0.07                   | 0.40**                      |                   | 0.47**            |
|    | aCL IgG<br>(U/mL)        | 0.22*                   | 0.42**                      | 0.30**            | 0.65**            | 0.24**                  | 0.49**                      | 0.33**            | 0.78**            | 0.20*                   | 0.47**                      | 0.47**            |                   |

Abbreviations: aPF4: anti-Platelet Factor 4; O.D: Optical Density; IgG: Immunoglobulin G; aβ2GP: anti-beta2-Glycoprotein; Ig: Immunoglobuline; aCL: anti-CardioLipin; IgM: Immunoglobulin M. Numbers indicate Spearman's rank correlation coefficient with continuity correction. \*p < 0.05, \*\*p < 0.01

**Table S2** Correlations between aPF4 and aPL antibodies in mRNA-based vaccine recipients

|    |                          | At time point T1           |                             |                   |                   | At time point T2           |                             |                   |                   | At time point T3           |                             |                   |                   |
|----|--------------------------|----------------------------|-----------------------------|-------------------|-------------------|----------------------------|-----------------------------|-------------------|-------------------|----------------------------|-----------------------------|-------------------|-------------------|
|    |                          | aPF4 IgG<br>(O.D<br>units) | aβ2GP<br>total Ig<br>(U/mL) | aCL IgM<br>(U/mL) | aCL IgG<br>(U/mL) | aPF4 IgG<br>(O.D<br>units) | aβ2GP<br>total Ig<br>(U/mL) | aCL IgM<br>(U/mL) | aCL IgG<br>(U/mL) | aPF4 IgG<br>(O.D<br>units) | aβ2GP<br>total Ig<br>(U/mL) | aCL IgM<br>(U/mL) | aCL IgG<br>(U/mL) |
| T1 | aPF4 IgG<br>(O.D units)  |                            | 0.14                        | 0.03              | 0.02              | 0.86**                     | 0.05                        | 0.08              | 0.05              | 0.81**                     | 0.09                        | 0.11              | 0.11              |
|    | aβ2GP total Ig<br>(U/mL) | 0.14                       |                             | 0.40**            | 0.50**            | 0.10                       | 0.92**                      | 0.36**            | 0.49**            | 0.10                       | 0.90**                      | 0.37**            | 0.63**            |
|    | aCL IgM<br>(U/mL)        | 0.03                       | 0.40**                      |                   | 0.36**            | -0.03                      | 0.41**                      | 0.93**            | 0.32**            | -0.02                      | 0.36**                      | 0.87**            | 0.43**            |
|    | aCL IgG<br>(U/mL)        | 0.02                       | 0.50**                      | 0.36**            |                   | 0.04                       | 0.40**                      | 0.36**            | 0.79**            | 0.01                       | 0.43**                      | 0.39**            | 0.75**            |
| T2 | aPF4 IgG<br>(O.D units)  | 0.86**                     | 0.10                        | -0.03             | 0.04              |                            | 0.01                        | -0.04             | 0.02              | 0.84**                     | 0.00                        | -0.05             | 0.06              |
|    | aβ2GP total Ig<br>(U/mL) | 0.05                       | 0.92**                      | 0.41**            | 0.40**            | 0.01                       |                             | 0.40**            | 0.52**            | -0.01                      | 0.88**                      | 0.38**            | 0.62**            |
|    | aCL IgM<br>(U/mL)        | 0.08                       | 0.36**                      | 0.93**            | 0.36**            | -0.04                      | 0.40**                      |                   | 0.40**            | -0.05                      | 0.36**                      | 0.89**            | 0.47**            |
|    | aCL IgG<br>(U/mL)        | 0.05                       | 0.49**                      | 0.32**            | 0.79**            | 0.02                       | 0.52**                      | 0.40**            |                   | 0.02                       | 0.43**                      | 0.46**            | 0.81**            |
| T3 | aPF4 IgG<br>(O.D units)  | 0.81**                     | 0.10                        | -0.02             | 0.01              | 0.84**                     | -0.01                       | -0.04             | 0.02              |                            | 0.01                        | 0.05              | 0.07              |

|  |                       |      |        |        |        |       |        |        |        |      |        |        |        |
|--|-----------------------|------|--------|--------|--------|-------|--------|--------|--------|------|--------|--------|--------|
|  | aβ2GP total Ig (U/mL) | 0.09 | 0.92** | 0.36** | 0.43** | 0.00  | 0.88** | 0.36** | 0.43** | 0.01 |        | 0.37** | 0.57** |
|  | aCL IgM (U/mL)        | 0.11 | 0.36** | 0.87** | 0.39** | -0.05 | 0.38** | 0.89** | 0.46** | 0.05 | 0.37** |        | 0.51** |
|  | aCL IgG (U/mL)        | 0.11 | 0.63** | 0.43** | 0.75** | 0.06  | 0.62** | 0.47** | 0.81** | 0.07 | 0.57** | 0.51** |        |

Abbreviations: aPF4: anti-Platelet Factor 4; O.D: Optical Density; IgG: Immunoglobulin G; aβ2GP: anti-beta2-Glycoprotein; Ig: Immunoglobuline; aCL: anti-CardioLipin; IgM: Immunoglobulin M. Numbers indicate Spearman's rank correlation coefficient with continuity correction. \*p < 0.05, \*\*p < 0.01

**Table S3** Correlations between aPF4 and aPL antibodies in rAV-based vaccine recipients

|    |                       | At time point T1     |                       |                |                | At time point T2     |                       |                |                | At time point T3     |                       |                |                |
|----|-----------------------|----------------------|-----------------------|----------------|----------------|----------------------|-----------------------|----------------|----------------|----------------------|-----------------------|----------------|----------------|
|    |                       | aPF4 IgG (O.D units) | aβ2GP total Ig (U/mL) | aCL IgM (U/mL) | aCL IgG (U/mL) | aPF4 IgG (O.D units) | aβ2GP total Ig (U/mL) | aCL IgM (U/mL) | aCL IgG (U/mL) | aPF4 IgG (O.D units) | aβ2GP total Ig (U/mL) | aCL IgM (U/mL) | aCL IgG (U/mL) |
| T1 | aPF4 IgG (O.D units)  |                      | -0.13                 | -0.14          | 0.22           | 0.76**               | -0.14                 | -0.10          | 0.26           | 0.86**               | -0.12                 | -0.09          | 0.36           |
|    | aβ2GP total Ig (U/mL) | -0.13                |                       | 0.61**         | 0.55**         | -0.13                | 0.79**                | 0.59**         | 0.46**         | -0.22                | 0.83**                | 0.45**         | 0.04           |
|    | aCL IgM (U/mL)        | -0.14                | 0.61**                |                | 0.41**         | -0.15                | 0.68**                | 0.83**         | 0.44**         | -0.25                | 0.40**                | 0.84**         | 0.09           |
|    | aCL IgG (U/mL)        | 0.22                 | 0.55**                | 0.41**         |                | 0.20                 | 0.48**                | 0.36**         | 0.75**         | 0.17                 | 0.34*                 | 0.17           | 0.48**         |
| T2 | aPF4 IgG (O.D units)  | 0.76**               | -0.13                 | -0.15          | 0.20           |                      | -0.13                 | -0.10          | 0.26*          | 0.91**               | -0.06                 | -0.10          | 0.51**         |
|    | aβ2GP total Ig (U/mL) | -0.14                | 0.79**                | 0.68**         | 0.48**         | -0.13                |                       | 0.64**         | 0.57**         | -0.30*               | 0.83**                | 0.58**         | 0.24           |
|    | aCL IgM               | -0.10                | 0.59**                | 0.83**         | 0.36**         | -0.09                | 0.64**                |                | 0.47**         | -0.28                | 0.35*                 | 0.77*          | 0.08           |

|    |                          |        |        |        |        |        |        |        |        |       |       |       |        |
|----|--------------------------|--------|--------|--------|--------|--------|--------|--------|--------|-------|-------|-------|--------|
|    | (U/mL)                   |        |        |        |        |        |        |        |        |       |       |       |        |
|    | aCL IgG<br>(U/mL)        | 0.26*  | 0.46** | 0.44** | 0.75** | 0.26*  | 0.57** | 0.47** |        | 0.37* | 0.21  | 0.29  | 0.72** |
| T3 | aPF4 IgG<br>(O.D units)  | 0.86** | -0.22  | -0.25  | 0.17   | 0.91** | -0.29* | -0.28  | 0.37*  |       | -0.16 | -0.14 | 0.39*  |
|    | aβ2GP total Ig<br>(U/mL) | -0.12  | 0.83** | 0.40** | 0.34*  | -0.06  | 0.83** | 0.35** | 0.21   | -0.16 |       | 0.42* | 0.29   |
|    | aCL IgM<br>(U/mL)        | -0.09  | 0.45** | 0.84** | 0.17   | -0.10  | 0.58** | 0.77** | 0.29   | -0.13 | 0.41* |       | 0.42*  |
|    | aCL IgG<br>(U/mL)        | 0.36*  | 0.04   | 0.09   | 0.48** | 0.51** | 0.24   | 0.07   | 0.72** | 0.39* | 0.29  | 0.42* |        |

Abbreviations: aPF4: anti-Platelet Factor 4; O.D: Optical Density; IgG: Immunoglobulin G; aβ2GP: anti-beta2-Glycoprotein; Ig: Immunoglobuline; aCL: anti-CardioLipin; IgM: Immunoglobulin M. Numbers indicate Spearman's rank correlation coefficient with continuity correction. \*p < 0.05, \*\*p < 0.01
